# Supplementary material
Source: PubMed Central journal article supplement (PMC3154713)
Supplement: supp_00444.2010_figs1.pdf [file supp_00444.2010_figs1.pdf]

| Gene Name              | Symbol    | p-Value | Fold up or<br>Down<br>Regulation |
|------------------------|-----------|---------|----------------------------------|
| PACAP                  | Adcyap1   | 0.861   | -1.02                            |
| 2900024I10Rik/AI846590 | Adcyap1r1 | 0.442   | -1.26                            |
| 30kDa/APN              | Adipoq    | 0.168   | -1.21                            |
| 2810031L11Rik/ACDCR1   | Adipor1   | 0.342   | -1.13                            |
| 1110001I14Rik/ADCR2    | Adipor2   | 0.004   | 1.51                             |
| Adra-2b/[a]2B          | Adra2b    | 0.717   | 1.16                             |
| Adrb-1/beta-AR         | Adrb1     | 0.059   | -1.63                            |
| Agrt/Art               | Agrp      | 0.216   | -1.33                            |
| Apoa-4                 | Apoa4     | 0.824   | -1.10                            |
| AW558010/Mgca          | Atrn      | 0.032   | 1.27                             |
| BDNF                   | Bdnf      | 0.258   | 1.43                             |
| BRS-3                  | Brs3      | 0.379   | -1.10                            |
| AI255234/ASP           | C3        | 0.265   | 1.30                             |
| CA/CGRP-1              | Calca     | 0.222   | -1.48                            |
| Clr                    | Calcr     | 0.861   | -1.02                            |
| Cart                   | Cartpt    | 0.861   | -1.02                            |
| CCK                    | Cck       | 0.139   | 4.78                             |
| AW106902               | Cckar     | 0.861   | -1.02                            |
| 2200003J09Rik          | Clps      | 0.325   | -1.22                            |
| CB1                    | Cnr1      | 0.954   | -1.21                            |
| Cntfralpha             | Cntfr     | 0.012   | -8.68                            |
| AA960140/AW322530      | Cpd       | 0.066   | -1.17                            |
| CPH/Cph-1              | Cpe       | 0.788   | -1.04                            |
| CRFR1/Crhr             | Crhr1     | 0.861   | -1.02                            |
| C030036C15Rik/Drd-1    | Drd1a     | 0.528   | 1.49                             |
| D2R/Drd-2              | Drd2      | 0.050   | 1.84                             |
| Galn                   | Gal       | 0.325   | -1.24                            |
| Galnr1                 | Galr1     | 0.816   | -1.30                            |
| GLP-1                  | Gcg       | 0.425   | 1.06                             |
| GR                     | Gcgr      | 0.503   | 1.17                             |
| GH                     | Gh        | 0.861   | -1.02                            |
| AA986417/GHBP          | Ghr       | 0.364   | -1.26                            |
| 2210006E23Rik/MTLRP    | Ghrl      | 0.132   | -1.66                            |
| C530020I22Rik          | Ghsr      | 0.861   | -1.02                            |
| GLP-1R/GLP1Rc          | Glp1r     | 0.861   | -1.02                            |
| AW049955/Gpr24         | Mchr1     | 0.763   | 1.19                             |
| BLP                    | Grp       | 0.861   | -1.02                            |
| GRP-R                  | Grpr      | 0.064   | -1.78                            |
| PPOX                   | Hcrt      | 0.565   | 1.07                             |
| Ox1r                   | Hcrt1     | 0.738   | 1.39                             |
| Bphs                   | Hrh1      | 0.510   | 1.23                             |

| Gene Name              | Symbol   | p-Value | Fold up or<br>Down<br>Regulation |
|------------------------|----------|---------|----------------------------------|
| 5-HT2C/5-HT2cR         | Htr2c    | 0.861   | -1.02                            |
| amylin                 | Iapp     | 0.861   | -1.02                            |
| Il-1a                  | Il1a     | 0.222   | -1.67                            |
| IL-1beta/Il-1b         | Il1b     | 0.143   | 2.07                             |
| CD121a/CD121b          | Il1r1    | 0.246   | -1.17                            |
| Il-6                   | Il6      | 0.792   | 1.10                             |
| CD126/IL-6R            | Il6ra    | 0.470   | 1.17                             |
| Ins-1/Ins2-rs1         | Ins1     | 0.508   | -1.07                            |
| AA986540/Ins-2         | Ins2     | 0.191   | -1.83                            |
| 4932439J01Rik/CD220    | Insr     | 0.007   | 1.29                             |
| ob/obese               | Lep      | 0.377   | 1.94                             |
| LEPROT/Leprb           | Lepr     | 0.000   | 2.71                             |
| MGC124211              | Mc3r     | 0.861   | -1.02                            |
| 3110023K12Rik          | Nmb      | 0.052   | -2.41                            |
| BB182387               | Nmbr     | 0.960   | -1.35                            |
| NMU                    | Nmu      | 0.861   | -1.02                            |
| FM-3/Gpr66             | Nmur1    | 0.267   | 1.63                             |
| 0710005A05Rik          | Npy      | 0.137   | 3.85                             |
| Npyr/Y1-R              | Npy1r    | 0.076   | 1.96                             |
| GR/Grl-1               | Nr3c1    | 0.288   | 1.05                             |
| A1848316/C030027L06Rik | Ntrk2    | 0.691   | -1.07                            |
| 5033428E16Rik/NMN-125  | Nts      | 0.638   | -1.57                            |
| NT-1R/NTR-1            | Ntsr1    | 0.861   | -1.02                            |
| KOR/KOR-1              | Oprk1    | 0.861   | -1.02                            |
| MOP-R/MOR-1            | Oprm1    | 0.861   | -1.02                            |
| AL024364/Oprs1         | Sigmar1  | 0.426   | -1.10                            |
| ACTH/BE                | Pomc     | 0.589   | 1.13                             |
| 4933429D07Rik/AW742785 | Ppara    | 0.124   | -1.37                            |
| Nr1c3/PPAR-gamma       | Pparg    | 0.512   | -1.07                            |
| A830037N07Rik/PGC-1    | Ppargc1a | 0.416   | 1.38                             |
| GR3/Gm339              | Prlhr    | 0.554   | 1.12                             |
| PTP-1B/PTP-HA2         | Ptpn1    | 0.249   | 1.34                             |
| MGC19143               | Pyg      | 0.861   | -1.02                            |
| A1850306               | Ramp3    | 0.766   | -1.08                            |
| 2900053A11Rik/A1852375 | Sort1    | 0.624   | 1.04                             |
| SOM/SRIF               | Sst      | 0.861   | -1.02                            |
| SSTR-2/Smstr-2         | Sstr2    | 0.497   | -1.28                            |
| Nr1a2/T3R[b]           | Thrb     | 0.230   | -1.19                            |
| DIF/TNF-alpha          | Tnf      | 0.054   | -2.59                            |
| A1324969/AL022609      | Trh      | 0.000   | -9.21                            |
| Ucn1                   | Ucn      | 0.598   | -2.15                            |

| <b>Gene Name</b>            | <b>Symbol</b> | <b>p-Value</b> | <b>Fold up or<br/>Down<br/>Regulation</b> |
|-----------------------------|---------------|----------------|-------------------------------------------|
| AI385626/Slc25a7            | Ucp1          | 0.086          | 1.53                                      |
| 9130014I08Rik/A530054C17Rik | Zfp91         | 0.024          | 1.43                                      |
| AI747421/Gur                | Gusb          | 0.486          | -1.06                                     |
| C81579/HPGRT                | Hprt1         | 0.043          | 1.27                                      |
| 90kDa/AL022974              | Hsp90ab1      | 0.358          | 1.07                                      |
| Gapd                        | Gapdh         | 0.188          | 1.19                                      |
| Actx/E430023M04Rik          | Actb          | 0.007          | -1.52                                     |
